# Supplementary material for: Single-cell epigenome analysis reveals age-associated decay of heterochromatin domains in excitatory neurons in the mouse brain
Source: Cell Res. 2022 Oct 7;32(11):1008–21. doi: 10.1038/s41422-022-00719-6 (PMC9652396; doi:10.1038/s41422-022-00719-6)
Supplement: Supplementary file 18 — Supplementary Table S1 [file 41422_2022_719_MOESM18_ESM.xlsx]

## Sheet: All-tissue-clustering
Supplementary Table S1. Markers for cell type annotation.
	Name	Short_Name	Class	Marker_1	Marker_2	Marker_3
1	Erythrocyte	Eryth	Myeloid	Hbb-bs
2	Neutrophils	Neutrophils	Myeloid	S100a8
3	Mesenchyhmal_Stem_Cell	MeSC	Other	Cxcl12
4	Pro_Erythrocyte	Pro_Eryth	Myeloid	Car1
5	Monocyte	Monocyte	Myeloid	Fn1
6	pre_B_cell	pre_B_cell	Lymphoid	Rag1
7	Neutrophils	Neutrophils	Myeloid	S100a8
8	T_cell	T_cell	Lymphoid	Cd96
9	dendritic_cells	DC	Myeloid	Siglech	Klk1
10	B_cell	B_cell	Lymphoid	Cd79a
11	Oligodendrocytes	Ogc	Glia	Mog
12	Dentate Gyrus Neurons	DG	ExN	Slc17a7	Prox1
13	CA neurons	CA	ExN	Slc17a7	Cldn22
14	Pericyte	Peri	Glia	Foxd1
15	Astrocyte	Asc	Glia	Apoe
16	Layer 2/3/4 cortical neurons	L2/3/4	ExN	Slc17a7	Cux2	Rorb
17	Oligodendrocyte precursor cells	Opc	Glia	Pdgfra
18	inhibitory neuron Six3 subtype	InN.Six3	InN	Gad2	Six3
19	inhibitory neuron Meis2 subtype	InN.Meis2	InN	Gad2	Meis2
20	Layer 5 cortical neurons	L5	ExN	Slc17a7	Deptor
21	Micglia	Mgc	Glia	c1qb
22	Layer 6 cortical neurons	L6	ExN	Slc17a7	Syt6
23	inhibitory neuron Sst subtype	InN.Sst	InN	Gad2	Sst
24	cardiomyocytes	CM	Muscle	Myh6
25	Smooth_Muscle_Cell	SMC	Muscle	Myh11
26	macrophage	Macg	Myeloid	C1qb
27	Endothelial	Endo	Other	Tie1
28	Fibroblast	FB	Other	Dcn
29	Low_Quality	Low_Q	NA
30	SkeletalMuscle	Skm	Muscle	Fhl3
31	Muscle Stem Cell	MuSC	Other	Pax7
32	SkeletalMuscle	Skm	Muscle	Fhl3
33	Fat	Fat	Other	Cidec

## Sheet: DH
Cluster	Name	ShortName	Class	Marker 1	Marker 2	Marker 3
1	Oligodendrocytes	Ogc	Glia	Mog
2	Dentate Gyrus Neurons subtype 1	DG.1	ExN	Slc17a7	Prox1	Card6
3	Dentate Gyrus Neurons subtype 2	DG.2	ExN	Slc17a7	Prox1	Card6
4	CA1 Neurons	CA1	ExN	Slc17a7	Fibcd1
5	Dentate Gyrus Neurons subtype 3	DG.3	ExN	Slc17a7	Prox1	Penk
6	Inhibitory Neurons	InN	InN	Gad2
7	Sublculum Entorhlnal	Sub_Ent	ExN	Slc17a7	Nxph3
8	Astrocytes	Asc	Glia	Apoe
9	CA2/3 Neurons	CA2/3	ExN	Slc17a7	Cldn32
10	Micglia	Mgc	Glia	C1qb
11	Low Quality Cells	LowQ	NA
12	Oligodendrocyte precursor cells	Opc	Glia	Pdgfra
13	Endothelial cells	Endo	Glia	Tie1
14	Pericytes	Peri	Glia	Foxd1
15	Smooth Muscle Cells	SMC	Glia	Myh11

## Sheet: FC
Cluster	Name	ShortName	Class	Marker 1	Marker 2	Marker 3
1	layer 2/3 cortical neurons	L2/3	ExN	Slc17a7	Cux2	Calb1
2	oligodendrocytes	Ogc	Glia	Mog
3	layer 4 cortical neurons	L4	ExN	Slc17a7	Rorb
4	inhibitory neuron (Vip+,Npy+)	InN.Vip.Npy	InN	Gad2	Vip	Npy
5	Astrocytes	Asc	Glia	Apoe
6	layer 5 cortical neuron (Deptor+)	L5.Deptor	ExN	Slc17a7	Deptor
7	inhibitory neuron (Meis2+)	InN.Meis2	InN	Gad2	Meis2	Sema5a
8	layer 6 cortical neurons	L6	ExN	Slc17a7	Syt6
9	microglia	Mgc	Glia	C1qb
10	inhibitory neuron (Six3+)	InN.Six3	InN	Gad2	Six3	Defb6
11	inhibitory neuron (Sst+,Pvalb+)	InN.SSt.Pvalb	InN	Gad2	Sst	Pvalb
12	Claustrum neuron	Claustrum	ExN	Slc17a7	Nr4a2	Galnt14
13	Oligodendrocyte precursor cells	Opc	Glia	Pdgfra
14	layer 5 cortical neuron (Parm1+)	L5.Parm1	ExN	Slc17a7	Parm1
15	Endothelial cells	Endo	Glia	Tie1
16	Pericytes	Peri	Glia	Foxd1
17	layer 5 cortical neuron (Fezf2+)	L5.Fezf2	ExN	Slc17a7	Fezf2	Tshz2
18	inhibitory neuron (Lcc38+,Plcxd3+)	InN.Lrrc38.Plcxd3	InN	Gad2	Lrrc38	Plcxd3

## Sheet: HT
Cluster	Name	ShortName	Class	Marker 1	Marker 2	Marker 3
1	cardiomyocytes	CM	Muscle	Myh6
2	fibroblast	FB	Other	Dcn	Sox9
3	endothelial cells	Endo	Other	Tie1	!Cytl1
4	low quality cells	LowQ	NA
5	macrophages	Macg	Meyloid	Mgl2	C1qb
6	smooth muscle cells	SMC	Muscle	Myh11
7	endocardial cells	Endocardial	Other	Tie1	Cytl1
8	B cells	B_cell	Lymphoid	Cd79a
9	Fat	Fat	Other	Cidec
10	T cells	T_cell	Lymphoid	Cd96
11	doublet cells	doublet	NA

## Sheet: LM
Cluster	Name	ShortName	Class	Marker 1	Marker 2	Marker 3
1	Skeletal Muscle (Myh4+, subtype 1)	Skm.Myh4.1	Muscle	Fhl3	Myh4	Kcnf1
2	Skeletal Muscle (Myh1+)	Skm.Myh1	Muscle	Fhl3	Myh1	Myl3
3	Low quality cells	LowQ	NA
4	Skeletal Muscle (Myh4+, subtype 2)	Skm.Myh4.2	Muscle	Fhl3	Myh4	Cyp2c54
5	Fibroblast	FB	Other	Dcn
6	Endothelial cells	Endo	Other	Tie1
7	myotendinous junction	MTJ	Muscle	Fhl3	Col22a1	Ankrd1
8	Macrophage	Macg	Myeloid	C1qb
9	Smooth Muscle Cells	SMC	Muscle	Myh11
10	Fat	Fat	Other	Cidec
11	B cells	B_cell	Lymphoid	Cd79a
12	Keratinocytes	Kerat	Other	Krt5
13	Muscle Stem Cells	MuSC	Other	Pax7
14	neuromuscular junction	NMJ	Muscle	Fhl3	Chrne	Colq
15	Skeletal Muscle (Gm5141+)	Skm.Gm5141	Muscle	Fhl3	Gm5141
16	Neutrophils	Neutrophil	Myeloid	S100a8
17	Erythocytes	Eryth	Myeloid	Hbb-bs

## Sheet: BM
Cluster	Name	ShortName	Class	Marker 1	Marker 2	Marker 3
1	Neutrophils subtype 1	Neutrophils.Il1b	Myeloid	S100a8	Il1b
2	Erythocytes	Eryth	Myeloid	Hbb-bs
3	Naïve B cells	Naïve_B_cell	Lymphoid	Cd79a	Fcer2a
4	Neutrophils subtype 2	Neutrophils.Ms4a3	Myeloid	S100a8	Ms4a3
5	Neutrophils subtype 3	Neutrophils.Gpr27	Myeloid	S100a8	Gpr27
6	Monocytes	Monocytes	Myeloid	Fn1
7	Pre B cells	Pre_B_cell	Lymphoid	Cd79a	Rag1
8	Pro Erythocytes	Pro_Eryth	Myeloid	Hbb-bs	Car1
9	T cells	T_cell	Lymphoid	Cd96
10	macrophage	Macg	Myeloid	C1qb
11	Mesenchymal Stem Cell	MeSC	Other	Cxcl12
12	Basophil	Basophil	Myeloid	Prss34
13	Dendritic cells	Dendritic	Myeloid	Klk1	Siglech
14	Late pro B cells	Late_Pro_B	Lymphoid	Cd79a	Igll1
15	Endothelial cells	Endo	Other	Tie1
16	Hematopoietic Stem cells	HeSC	Other	Cd34
17	Plasma cells	Plasma	Lymphoid	Igkc
